# Supplementary material
Source: PubMed Central journal article supplement (PMC4119518)
Supplement: NIHMS603392-supplement-1.pdf [file NIHMS603392-supplement-1.pdf]

## **SUPPLEMENTAL FIGURES**

### **IL-33 and Thymic Stromal Lymphopoietin Mediate Immune Pathology in Response to Chronic Airborne Allergen Exposure**

Running Title: IL-33 and TSLP in chronic airway inflammation

Koji Iijima<sup>\*</sup>, Takao Kobayashi<sup>\*</sup>, Kenichiro Hara<sup>\*</sup>, Gail M. Kephart<sup>\*</sup>, Steven F. Ziegler<sup>†</sup>,  
Andrew N. McKenzie<sup>‡</sup>, and Hirohito Kita<sup>\*§</sup>

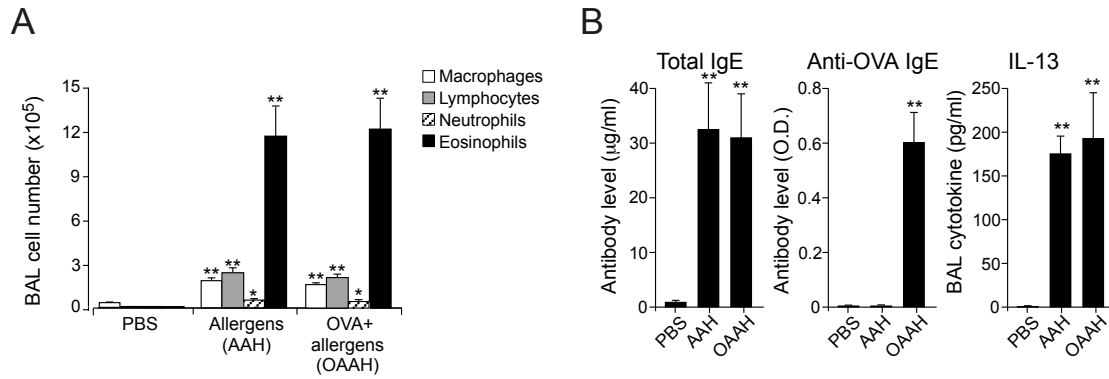

Supplemental Figure 1

**Supplemental Figure 1.** OVA is unnecessary for robust type 2 immune responses and airway eosinophilia. (A) Naïve mice were exposed to combinations of allergens (*Alternaria*, *Aspergillus*, HDM) with (OAAH) or without OVA antigen (AAH) for 4 weeks. BAL fluids were analyzed for the number of inflammatory cells. (B) The levels of plasma antibodies and BAL IL-13 were analyzed. Results are the mean  $\pm$  SEM (n=5). \*:  $p < 0.05$ , \*\*:  $p < 0.01$ , compared to mice exposed to PBS.

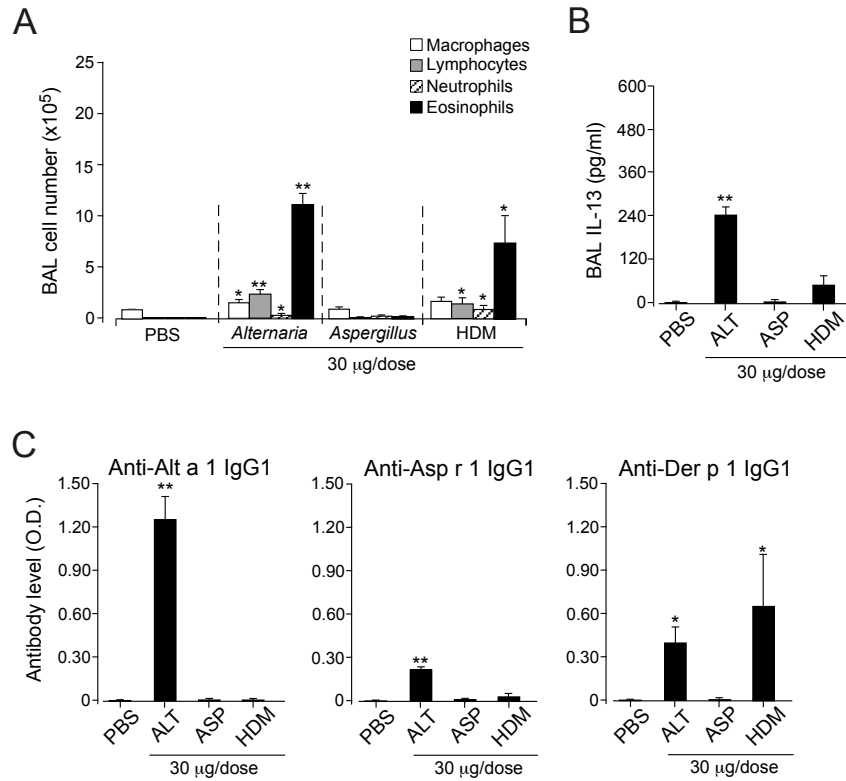

Supplemental Figure 2

**Supplemental Figure 2. *Alternaria* alone or HDM alone induce type 2 immune responses at a high dose.** Naïve mice were exposed to each allergen (30 µg/dose) for 4 weeks; ALT, *Alternaria*; ASP, *Aspergillus*; HDM, house dust mite. (A) BAL fluids were analyzed for the number of inflammatory cells. (B) The levels of IL-13 in BAL fluids were analyzed. (C) The levels of IgG1 antibodies to Alt a 1, Asp r 1 (Asp f 1 homologue) and Der p 1 in the plasma were analyzed. Results are the mean ± SEM (n=5). \*: p<0.05, \*\*: p<0.01, compared to mice exposed to PBS.

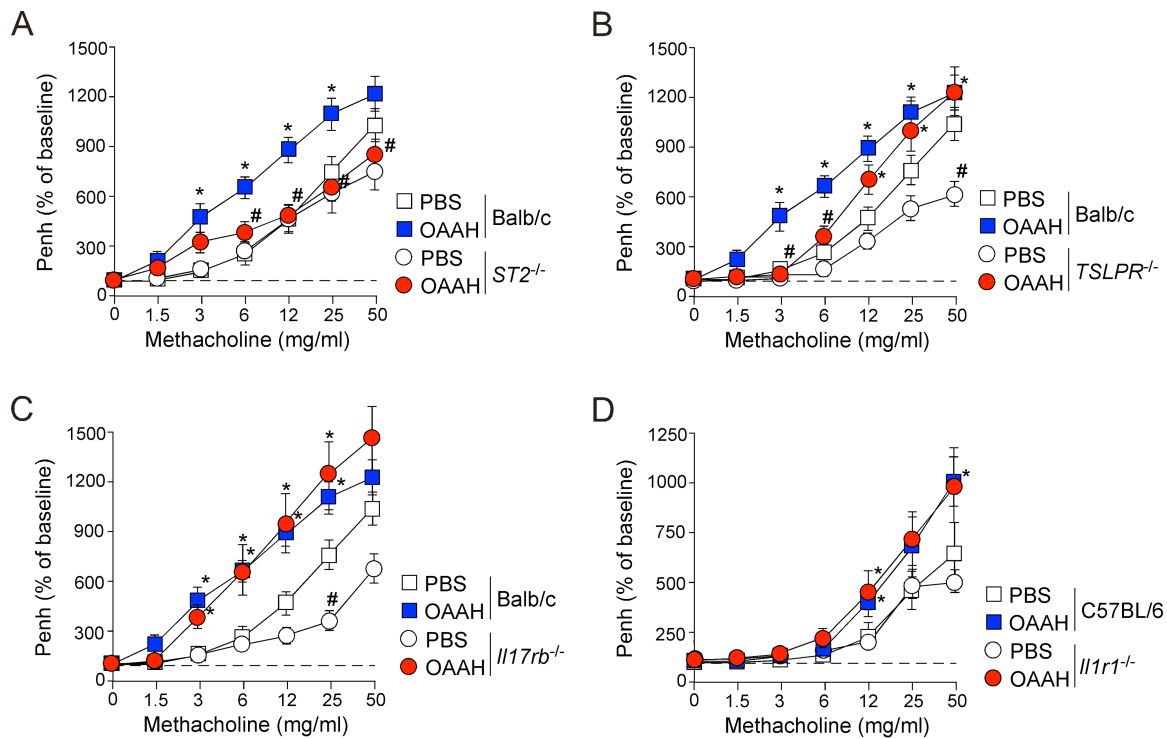

Supplemental Figure 3

**Supplemental Figure 3.** Airway reactivity to methacholine in allergen-exposed animals is dependent on IL-33 and TSLP. Wild-type Balb/c or C57BL/6 mice or mice deficient in cytokine receptors were exposed to PBS or allergens (OAAH) for 4 weeks. Airway reactivity to methacholine was examined by whole body plethysmography as described in the Materials and Methods. Results are the mean  $\pm$  SEM (n=6 in each group) and are representative of two (panels A, B, and C) or one experiment (panel D). \*: p<0.05, compared to PBS-exposed animals in the same strain, #: p<0.05, compared to allergen-exposed wild-type mice.
